# Supplementary material for: USP26 regulates TGF‐β signaling by deubiquitinating and stabilizing SMAD7
Source: PubMed Central journal article supplement (PMC5412796; doi:10.15252/embr.201643270), 2017-04-05
Supplement: EMBR-18-797-s004.pdf [file EMBR-18-797-s004.pdf]

Figure 2A

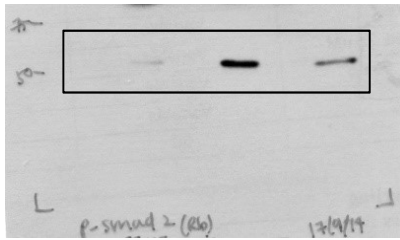

Anti-pSMAD2

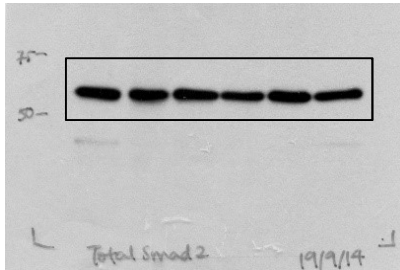

Anti-SMAD2

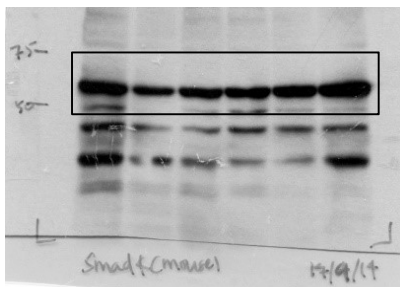

Anti-SMAD4

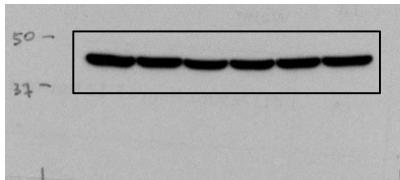

Anti-B-Actin

Figure 2B

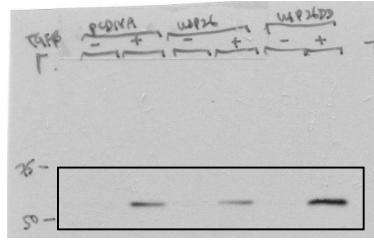

Anti-pSMAD2

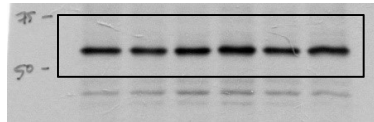

Anti-SMAD2

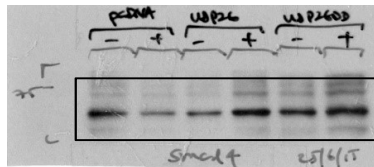

Anti-SMAD4

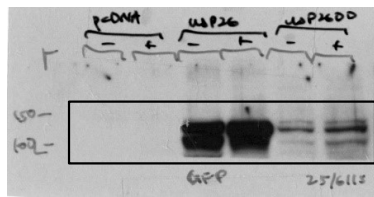

Anti-GFP

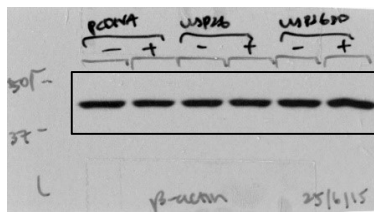

Anti-B-Actin

Figure 2C

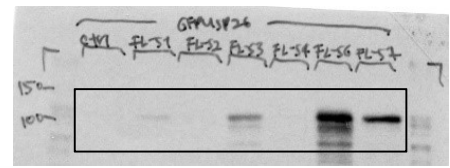

Anti-GFP

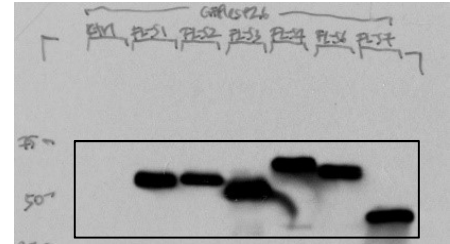

Anti-Flag

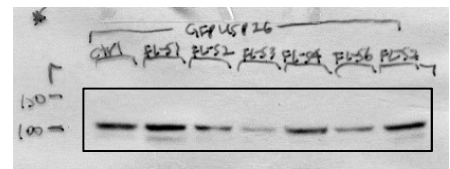

Anti-GFP

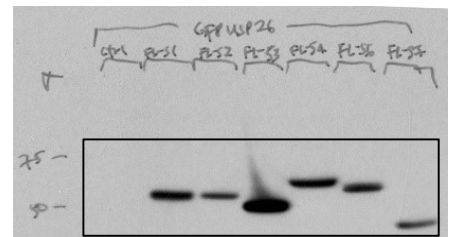

Anti-Flag

Figure 2D

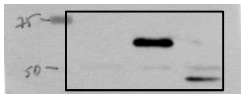

Anti-Flag

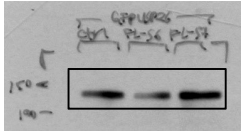

Anti-GFP

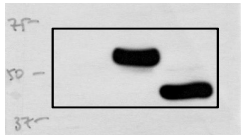

Anti-Flag

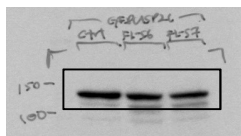

Anti-GFP

Figure 2E

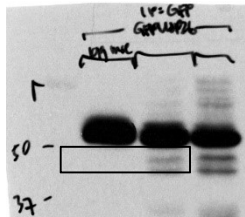

Anti-SMAD7

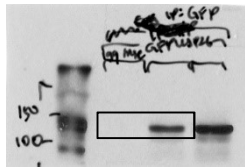

Anti-GFP

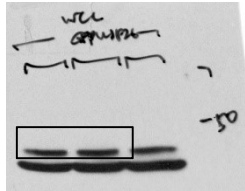

Anti-SMAD7

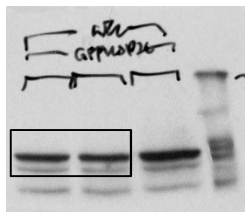

Anti-GFP

Figure 2F

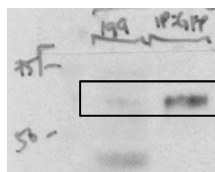

Anti-SMAD6

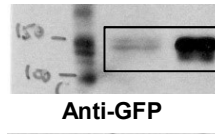

Anti-GFP

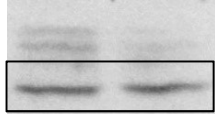

Anti-SMAD6

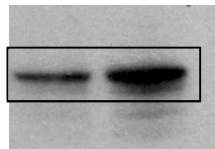

Anti-GFP

Figure 2G

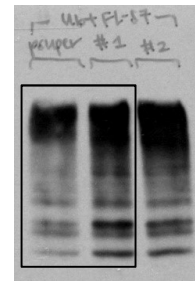

Anti-HA

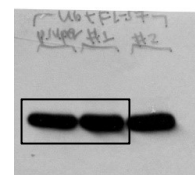

Anti-Flag

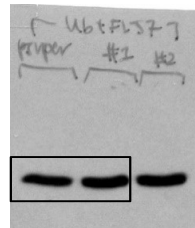

Anti-Flag

Figure 2H

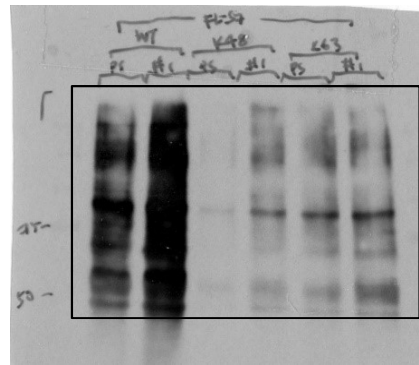

Anti-HA

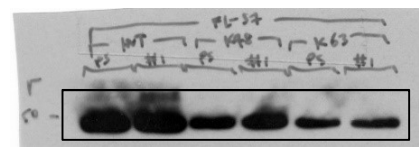

Anti-Flag

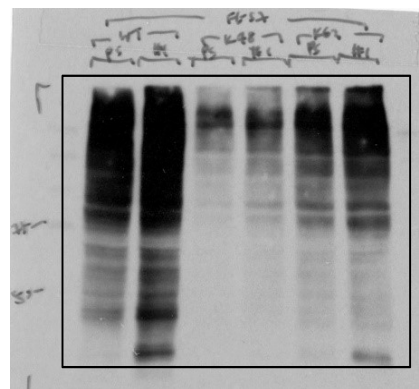

Anti-HA

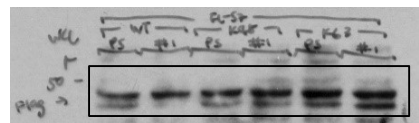

Anti-Flag
