# Supplementary material for: USP26 regulates TGF‐β signaling by deubiquitinating and stabilizing SMAD7
Source: PubMed Central journal article supplement (PMC5412796; doi:10.15252/embr.201643270), 2017-04-05
Supplement: EMBR-18-797-s005.pdf [file EMBR-18-797-s005.pdf]

Figure 3A

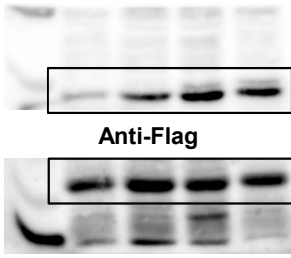

Anti-B-Actin

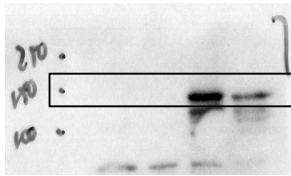

Anti GFP

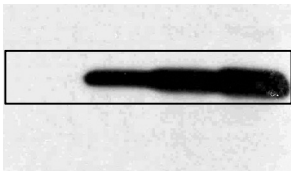

Anti GFP

Figure 3B

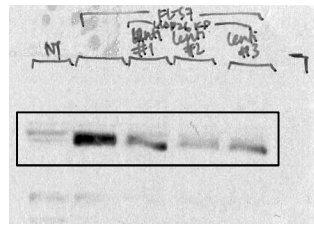

Anti-Flag

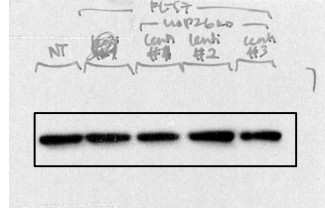

Anti-B-Actin

Figure 3C

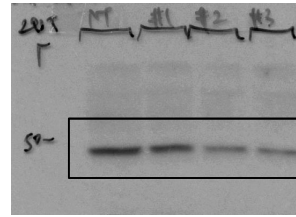

Anti-SMAD7

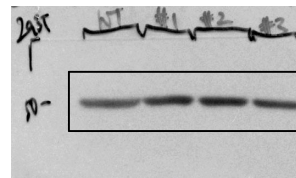

Anti-B-Tubulin

Figure 3D

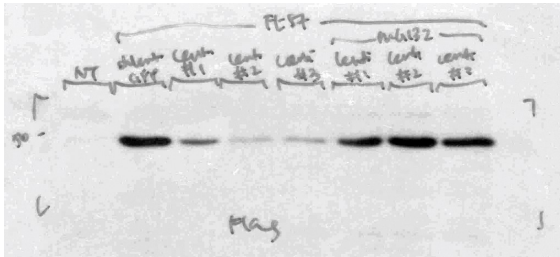

Anti-Flag

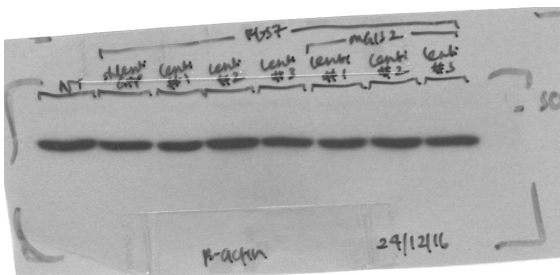

Anti-B-Actin

Figure 3E

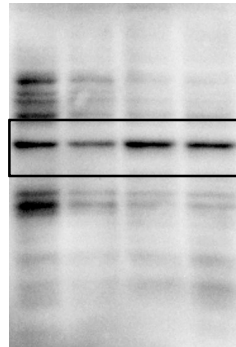

Anti-SMAD7

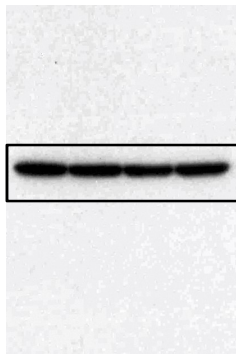

Anti-B-Actin

Figure 3F

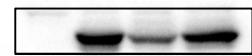

Anti-TGFBR (R-20)

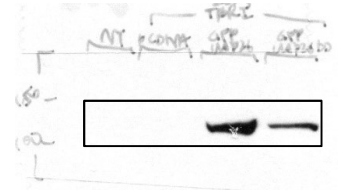

Anti-GFP

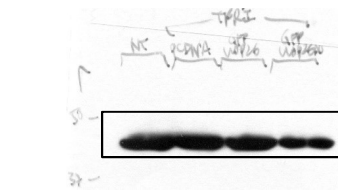

Anti-B-Actin

Figure 3G

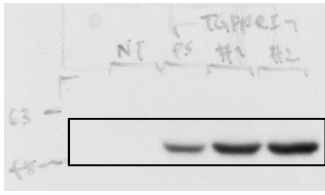

Anti-TGFBR (R-20)

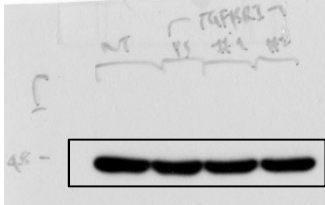

Anti-B-Actin

Figure 3H

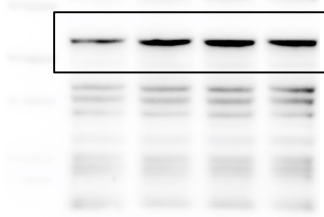

Anti-TGFBR (V-22)

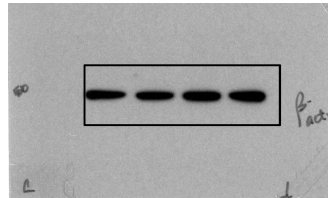

Anti-B-Actin

Figure 3I

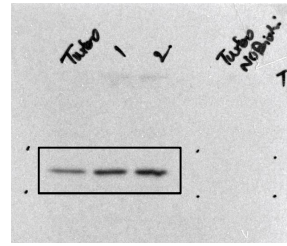

Anti-TGFBR (V-22)

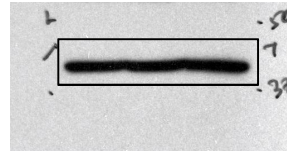

Anti-B-Actin

Figure 3J

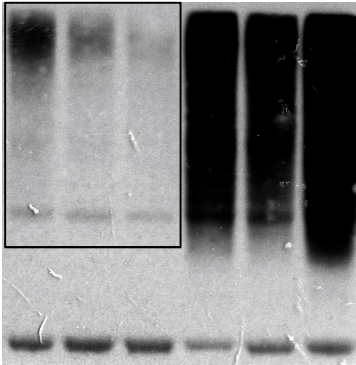

Anti-HA

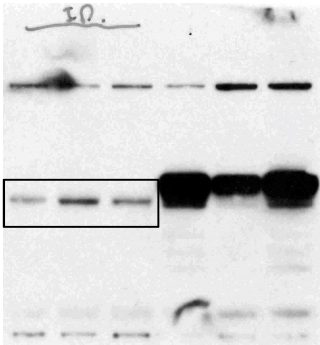

Anti-TGFBR

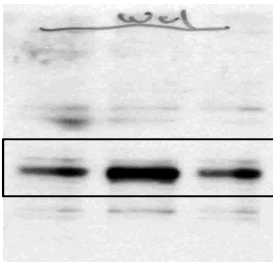

Anti-TGFBR
