# Supplementary figures and images for: USP26 regulates TGF‐β signaling by deubiquitinating and stabilizing SMAD7
Source: PubMed Central journal article supplement (PMC5412796; doi:10.15252/embr.201643270), 2017-04-05

Figure 1B

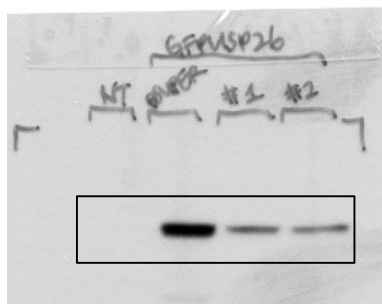

Anti-GFP

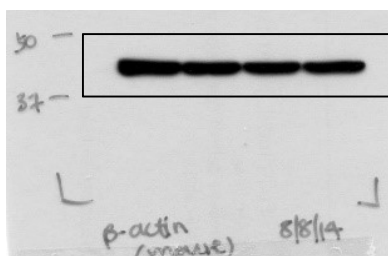

Anti-B-Actin

Supplement: EMBR-18-797-s003.pdf [file EMBR-18-797-s003.pdf]

**Figure 4G**

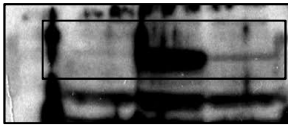

**Anti-GFP**

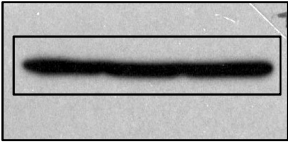

**Anti B-Actin**

Supplement: EMBR-18-797-s006.pdf [file EMBR-18-797-s006.pdf]
